# Supplementary material for: Placement of Posterior Composite Restorations: A Cross-Sectional Study of Dental Practitioners in Al-Kharj, Saudi Arabia
Source: MDPI journal article supplement (doi:10.3390/ijerph182312408), 2021-11-25
Supplement: s1 [file s1]

**Questionnaire questions:**

**Q1. Which material do often you use in posterior small cavity (1 or 2 surfaces)?**

- ☐ Amalgam
- ☐ Composite
- ☐ Resin modified glass ionomer

**Q2. Which material do you often use in posterior large cavity (3 or more surfaces)?**

- ☐ Amalgam
- ☐ Composite
- ☐ Other (Indirect restoration)

**Q3. Do you often place direct posterior composite restorations in patients with oral para-functional activity?**

- ☐ Yes
- ☐ No

**Q4. Do you often place direct posterior composite restorations in patients with poor oral hygiene?**

- ☐ Yes
- ☐ No

**Q5. Do you often place direct posterior composite restorations in posterior cavities with 1-2 mm Sub-gingival margins?**

- ☐ Yes
- ☐ No

**Q6. Do you prepare a minimum pulpal depth of 2mm for occlusal cavities?**

- ☐ Yes
- ☐ No

**Q7. Do you prepare mechanical means of retention for composite restorations?**

- ☐ Yes
- ☐ No

**Q8. Do you bevel the occlusal margins of the cavity?**

- ☐ Yes
- ☐ No

**Q9. Do you bevel the gingival margin of the cavity?**

- ☐ Yes
- ☐ No

**Q10. How often do you achieve the operative field isolation?**

- ☐ Rubber dam
- ☐ Cotton rolls and intraoral suction (Partial isolation)
- ☐ Other

**Q11. Which adhesive strategy do you use more often?**

- ☐ Etch-and-rinse (total etch)
- ☐ Self-etching (no acid etching)
- ☐ Selective enamel etching

**Q12. Which placement technique do you often apply for the placement of composite restorations?**

- ☐ Horizontal layering
- ☐ Oblique layering
- ☐ Bulk-fill

**Q13. Which light-curing unit do you often use to light-cure posterior restorations?**

- ☐ Quartz tungsten halogen (QTH)
- ☐ Light emitting diodes (LED)
- ☐ Other

**Q14. Do you regularly monitor the output of light-curing unit with a radiometer?**

- ☐ Yes
- ☐ No

**Q15. How long do you light-cure composite increment of 2mm thickness?**

- ☐ 10s
- ☐ 15s
- ☐ 20s

**Q16. For class II composite restorations, after removal of the matrix band, do you often perform additional light-curing from the buccal and lingual directions?**

- ☐ Yes
- ☐ No

**Q17. Which matrix system do you often use to restore the proximal contact with composite restoration?**

- ☐ Sectional matrix
- ☐ Tofflemire matrix
- ☐ Circumferential matrix
- ☐ Other
